# Supplementary material for: The first self-assembled trimetallic lanthanide helicate: different coordination sites in symmetrical molecular architecturesElectronic supplementary information (ESI) available: least-square planes, selected bond distances and bite angles and a figure showing the atomic numbering scheme for [Eu3(C63H65N13O2)3](CF3SO3)9(CH3CN)9(H2O)2. A scheme summarizing the multistep synthesis of L3 and tables collecting ESI-MS and 1H NMR data, and elemental analyses. See http://www.rsc.org/suppdata/cc/b2/b201859d/
Source: Royal Society of Chemistry journal article supplement (doi:10.1039/b201859d), 2002-04-08
Supplement: b201859d.doc [file b201859d.doc]

**Supplementary Material (ESI) for Chemical CommunicationsThis journal is © The Royal Society of Chemistry 2002**

**The First Self-Assembled Trimetallic Lanthanide Helicate: Different Coordination Sites in Symmetrical Molecular Architectures.**

Bernard Bocquet, Gérald Bernardinelli, Nadjet Ouali, Sebastien Floquet, Fabien Renaud, Gérard Hopfgartner and Claude Piguet

Table S1 Molecular peaks of complexes and adduct ions observed during the ESI-MS titrations of L3 with Ln(CF3SO3)3 (Ln = La, Eu, Gd, Tb, Lu) in acetonitrile (total ligand concentration: 10-4 M).

| Metal | Cation | m/za | Metal | Cation | m/za |
| --- | --- | --- | --- | --- | --- |
| LaIII | [La2(L3)3(CF3SO3)]5+ | 707.9 |  | [Gd3(L3)3(CF3SO3)3]6+ | 671.2 |
|  | [La2(L3)3(CF3SO3)2]4+ | 920.9 |  | [Gd3(L3)3(CF3SO3)4]5+ | 835.6 |
|  | [La3(L3)3(CF3SO3)2]7+ | 546.9 |  | [Gd3(L3)3(CF3SO3)5]4+ | 1081.6 |
|  | [La3(L3)3(CF3SO3)3]6+ | 662.1 |  | [Gd3(L3)3(CF3SO3)6]3+ | 1491.2 |
|  | [La3(L3)3(CF3SO3)4]5+ | 824.2 | TbIII | [Tb3(L3)3(CF3SO3)2]7+ | 554.7 |
|  | [La3(L3)3(CF3SO3)5]4+ | 1067.7 |  | [Tb3(L3)3(CF3SO3)3]6+ | 672.1 |
|  | [La3(L3)3(CF3SO3)6]3+ | 1473.5 |  | [Tb3(L3)3(CF3SO3)4]5+ | 836.2 |
| EuIII | [Eu2(L3)3(CF3SO3)]5+ | 712.5 |  | [Tb3(L3)3(CF3SO3)5]4+ | 1082.6 |
|  | [Eu2(L3)3(CF3SO3)2]4+ | 927.7 |  | [Tb3(L3)3(CF3SO3)6]3+ | 1493.1 |
|  | [Eu3(L3)3(CF3SO3)2]7+ | 552.0 |  | [Tb3(L3)3(CF3SO3)7]2+ | 2314.4 |
|  | [Eu3(L3)3(CF3SO3)3]6+ | 668.7 | LuIII | [Lu2(L3)3]6+ | 576.5 |
|  | [Eu3(L3)3(CF3SO3)4]5+ | 832.3 |  | [Lu2(L3)3(CF3SO3)]5+ | 721.7 |
|  | [Eu3(L3)3(CF3SO3)5]4+ | 1077.6 |  | [Lu3(L3)3(CF3SO3)2]7+ | 561.7 |
|  | [Eu3(L3)3(CF3SO3)6]3+ | 1486.5 |  | [Lu3(L3)3(CF3SO3)3]6+ | 680.2 |
| GdIII | [Gd2(L3)3]6+ | 570.6 |  | [Lu3(L3)3(CF3SO3)4]5+ | 845.9 |
|  | [Gd2(L3)3(CF3SO3)]5+ | 714.4 |  | [Lu3(L3)3(CF3SO3)5]4+ | 1094.7 |
|  | [Gd2(L3)3(CF3SO3)2]4+ | 930.2 |  | [Lu3(L3)3(CF3SO3)6]3+ | 1509.4 |
|  | [Gd3(L3)3(CF3SO3)2]7+ | 554.0 |  |  |  |

a m/z values given for the maximum of the peak at unit mass resolution

Table S2 1H NMR shifts (with respect to SiMe4) of [Ln3(L3)3]9+ in CD3CN at 298 K.a

Terminal tridentate binding unit

| Compd | Me18 | Me19 | Me20 | H16 | H16’ | H15 | H15’ | H14 | H14’ | H11 | H10 | H9 | H8 | H7 | H6 |
| --- | --- | --- | --- | --- | --- | --- | --- | --- | --- | --- | --- | --- | --- | --- | --- |
| [La3(L3)3]9+ | 1.39 | 0.90 | 1.42 | 4.59 | 4.44 | 3.31 | 3.22 | 4.35 | 3.99 | 7.60 | 8.18 | 8.20 | 7.53 | 7.24 | 5.76 |
| [Lu3(L3)3]9+ | 1.44 | 1.04 | 1.45 | 4.69 | 4.58 | 3.30 | 3.28 | 4.42 | 4.18 | 7.66 | 8.17 | 8.28 | 7.50 | 7.16 | 5.19 |
| [Y3(L3)3]9+ | 1.44 | 1.01 | 1.46 | 4.68 | 4.56 | 3.29 | 3.27 | 4.41 | 4.13 | 7.65 | 8.17 | 8.27 | 7.51 | 7.19 | 5.32 |
| [Ce3(L3)3]9+ | 1.78 | 1.05 | 2.46 | 5.44 | 4.95 | 3.49 | 2.50 | 4.51 | 4.36 | 8.87 | 9.78 | 10.27 | 7.47 | 6.79 | -2.40 |
| [Pr3(L3)3]9+ | 2.00 | 1.27 | 3.09 | 6.11 | 5.35 | 3.91 | 2.81 | 5.31 | 5.25 | 9.68 | 10.62 | 11.76 | 7.78 | 6.39 | -9.60 |
| [Nd3(L3)3]9+ | 1.12 | -2.00 | 2.10 | 5.27 | 4.84 | 5.29 | 4.99 | 3.63 | 3.17 | 9.12 | 9.57 | 10.51 | 8.16 | 6.79 | -2.73 |
| [Eu3(L3)3]9+ | 0.84 | 0.71 | 3.55 | 3.10 | 2.68 | 3.99 | 3.91 | 3.33 | 3.10 | 5.26 | 6.35 | 4.76 | 4.48 | 7.75 | 13.85 |
| [Yb3(L3)3]9+ | -0.48 | 0.07 | 0.37 | 3.43 | 1.85 | 3.66 | 3.24 | 3.89 | 3.36 | 5.61 | 6.44 | 6.19 | 7.38 | 7.88 | b |

Central tridentate binding unit

| Compd | Me17 | H13 | H13’ | H12 | H12’ | H5 | H4 | H3 | H2 | H1 |
| --- | --- | --- | --- | --- | --- | --- | --- | --- | --- | --- |
| [La3(L3)3]9+ | 0.67 | 2.84 | 2.77 | 3.58 | 3.39 | 5.88 | 6.92 | 7.19 | 7.64 | 8.09 |
| [Lu3(L3)3]9+ | 0.58 | 2.69 | 2.58 | 3.53 | 3.39 | 5.39 | 6.89 | 7.24 | 7.53 | 7.88 |
| [Y3(L3)3]9+ | 0.59 | 2.68 | 2.66 | 3.54 | 3.39 | 5.50 | 6.87 | 7.22 | 7.55 | 7.92 |
| [Ce3(L3)3]9+ | -2.44 | 2.50 | 2.33 | 2.87 | 2.50 | -2.17 | 6.27 | 7.14 | 8.19 | 8.71 |
| [Pr3(L3)3]9+ | -4.74 | 2.00 | 0.40 | 2.20 | 2.00 | -8.75 | 5.77 | 7.21 | 9.73 | 9.63 |
| [Nd3(L3)3]9+ | -2.00 | 2.44 | 1.67 | 2.76 | 2.58 | -1.31 | 6.29 | 7.51 | 9.80 | 9.43 |
| [Eu3(L3)3]9+ | 0.53 | 1.38 | 1.29 | 1.21 | 1.03 | 12.95 | 7.61 | 6.39 | 4.21 | 6.23 |
| [Yb3(L3)3]9+ | 6.57 | 4.24 | 2.58 | 5.03 | 4.80 | b | 8.59 | 7.93 | 6.93 | 7.60 |

**a See figure 1 for the numbering scheme. b Too broad to be observed.**

Table S3 Elemental Analyses for Complexes [Ln3(L3)3](CF3SO3)9.mH2O (Ln = La, Eu, Gd, Tb, Lu). Calculated Values are Given in Parentheses.

| Compd | %C | %H | %N |
| --- | --- | --- | --- |
| [La3(L3)3](CF3SO3)9.4H2O | 48.24 (48.15) | 4.40 (4.14) | 11.06 (11.06) |
| [Eu3(L3)3](CF3SO3)9.4H2O | 47.79 (47.77) | 4.17 (4.11) | 10.95 (10.97) |
| [Gd3(L3)3](CF3SO3)9.2H2O | 47.95 (47.96) | 4.16 (4.05) | 10.96 (11.02) |
| [Tb3(L3)3](CF3SO3)9.12H2O | 46.23 (46.24) | 4.14 (4.29) | 10.48 (10.62) |
| [Lu3(L3)3](CF3SO3)9.6H2O | 46.80 (46.78) | 4.33 (4.10) | 10.61 (10.74) |

Table S4 Selected bond distances (Å) and angles (°) for [Eu3(L3)3](CF3SO3)9(CH3CN)9(H2O)2.

distances

Eu1...Eu2 9.3165(7) Eu1...Eu3 9.0762(7) Eu2...Eu3 18.3650(9)

____________________________________________________________________________

ligand a ligand b ligand c

____________________________________________________________________________

Eu1-N1 2.607(6) 2.555(7) 2.608(7)

Eu1-N2 2.534(7) 2.593(7) 2.599(6)

Eu1-N8 2.599(7) 2.583(5) 2.585(7)

Eu2-O1 2.381(6) 2.376(6) 2.408(6)

Eu2-N4 2.597(6) 2.549(7) 2.643(7)

Eu2-N6 2.594(7) 2.651(7) 2.653(6)

Eu3-O2 2.375(8) 2.400(7) 2.405(5)

Eu3-N10 2.565(7) 2.665(7) 2.594(7)

Eu3-N12 2.597(7) 2.571(6) 2.565(8)

angles

Eu2…Eu1…Eu3 173.71(1)

____________________________________________________________________________

bite angles

ligand a ligand b ligand c

____________________________________________________________________________

N1-Eu1-N2 63.7(2) 63.2(2) 63.5(2)

N1-Eu1-N8 62.2(2) 62.4(2) 61.8(2)

N2-Eu1-N8 125.9(2) 125.5(2) 125.2(2)

O1-Eu2-N6 64.5(2) 63.1(2) 63.2(2)

N4-Eu2-N6 62.8(2) 62.6(2) 61.7(2)

O1-Eu2-N4 127.1(2) 125.7(2) 124.9(2)

N10-Eu3-N12 62.6(2) 63.9(2) 63.1(2)

O2-Eu3-N12 63.1(2) 62.7(2) 62.6(2)

O2-Eu3-N10 125.7(2) 125.1(2) 125.6(2)

Table S5 Selected Least-Squares Plane Data for for [Eu3(L3)3](CF3SO3)9(CH3CN)9(H2O)2.

deviations, Å

__________________

Least-squares planes descriptiona max atom

____________________________________________________________________________

1Pa1 pyridine, N(1a) 0.02 C(5a)
1Ba2 benzimidazole, N(2a), N(3a) 0.06 C(11a)
1Ba8 benzimidazole, N(8a), N(9a) 0.02 C(31a)
2Pa6 pyridine, N(6a) 0.03 C(22a)
2Ca1 carboxamide C(26a), C(27a), O(1a), N(7a) 0.003 C(26a)
2Ba4 benzimidazole, N(4a), N(5a) 0.04 C(20a)
3Pa12 pyridine, N(12a) 0.05 C(50a)
3Ba10 benzimidazole, N(10a), N(11a) 0.04 C(45a)
3Ca2 carboxamide C(50a), C(51a), O(2a), N(13a) 0.01 C(51a)
1Pb1 pyridine, N(1b) 0.01 C(4b)
1Bb2 benzimidazole, N(2b), N(3b) 0.05 N(2b)
1Bb8 benzimidazole, N(8b), N(9b) 0.04 C(36b)
2Pb6 pyridine, N(6b) 0.01 C(25b)
2Cb1 carboxamide C(26b), C(27b), O(1b), N(7b) 0.01 C(26b)
2Bb4 benzimidazole, N(4b), N(5b) 0.04 C(20b)
3Pb12 pyridine, N(12b) 0.06 C(50b)
3Bb10 benzimidazole, N(10b), N(11b) 0.05 N(10b)
3Cb2 carboxamide C(50b), C(51b), O(2b), N(13b) 0.008 C(51b)
1Pc1 pyridine, N(1c) 0.02 C(3c)
1Bc2 benzimidazole, N(2c), N(3c) 0.04 C(9c)
1Bc8 benzimidazole, N(8c), N(9c) 0.03 C(33c)
2Pc6 pyridine, N(6c) 0.01 C(25c)
2Cc1 carboxamide C(26c), C(27c), O(1c), N(7c) 0.007 C(26c)
2Bc4 benzimidazole, N(4c), N(5c) 0.03 C(14c)
3Pc12 pyridine, N(12c) 0.04 C(47c)
3Bc10 benzimidazole, N(10c), N(11c) 0.03 N(11c)
3Cc2 carboxamide C(50c), C(51c), O(2c), N(13c) 0.001 C(51c)

a The rings are denoted as P = pyridine, B = benzimidazole and C = carboxamide, belonging to ligand strand a, b, or c, containing the characteristic nitrogen or oxygen atom j and bound to Eui. Thus, iBbj is the benzimidazole ring of strand b that is bound to Eui and containing nitrogen j. The error in the dihedral angles between planes is typically 0.5°.

Interplane Angles (°)

|  | 1Ba2 | 1Ba8 | 1Pa6 | 1Ca1 | 1Ba4 | 1Pa12 | 1Ba10 | ICa2 | 1Pb1 | 1Bb2 | 1Bb8 | 1Pb6 | 1Cb1 | 1Bb4 | 1Pb12 | 1Bb10 | ICb2 | 1Pc1 | 1Bc2 | 1Bc8 | 1Pc6 | 1Cc1 | 1Bc4 | 1Pc12 | 1Bc10 | ICc2 |
| --- | --- | --- | --- | --- | --- | --- | --- | --- | --- | --- | --- | --- | --- | --- | --- | --- | --- | --- | --- | --- | --- | --- | --- | --- | --- | --- |
| 1Pa1 | 35 | 13 | 103 | 40 | 69 | 116 | 113 | 83 | 46 | 22 | 63 | 120 | 126 | 116 | 11 | 140 | 39 | 121 | 112 | 124 | 25 | 22 | 14 | 42 | 21 | 46 |
| 1Ba2 |  | 43 | 101 | 55 | 77 | 144 | 128 | 108 | 63 | 54 | 66 | 154 | 146 | 148 | 34 | 171 | 31 | 143 | 119 | 152 | 59 | 22 | 44 | 72 | 55 | 62 |
| 1Ba8 |  |  | 92 | 51 | 79 | 104 | 99 | 70 | 56 | 27 | 75 | 111 | 113 | 106 | 9 | 130 | 36 | 108 | 98 | 112 | 24 | 35 | 1 | 45 | 21 | 57 |
| 1Pa6 |  |  |  | 143 | 168 | 59 | 33 | 48 | 146 | 115 | 166 | 79 | 48 | 67 | 92 | 72 | 72 | 48 | 20 | 61 | 106 | 117 | 92 | 123 | 108 | 147 |
| 1Ca1 |  |  |  |  | 29 | 122 | 137 | 107 | 9 | 28 | 25 | 110 | 138 | 116 | 51 | 128 | 76 | 134 | 145 | 126 | 38 | 33 | 51 | 29 | 36 | 7 |
| 1Ba4 |  |  |  |  |  | 115 | 140 | 121 | 23 | 54 | 13 | 96 | 129 | 107 | 80 | 108 | 104 | 127 | 154 | 115 | 63 | 59 | 79 | 45 | 61 | 23 |
| 1Pa12 |  |  |  |  |  |  | 25 | 36 | 115 | 105 | 128 | 21 | 16 | 8 | 112 | 28 | 115 | 12 | 39 | 8 | 96 | 137 | 103 | 93 | 100 | 118 |
| 1Ba10 |  |  |  |  |  |  |  | 31 | 133 | 112 | 152 | 46 | 18 | 34 | 104 | 44 | 96 | 16 | 14 | 28 | 101 | 134 | 99 | 108 | 105 | 136 |
| 1Ca2 |  |  |  |  |  |  |  |  | 105 | 81 | 129 | 54 | 42 | 42 | 77 | 64 | 80 | 38 | 38 | 44 | 70 | 106 | 70 | 80 | 74 | 108 |
| 1Pb1 |  |  |  |  |  |  |  |  |  | 31 | 24 | 101 | 130 | 108 | 57 | 119 | 84 | 127 | 143 | 118 | 39 | 42 | 55 | 25 | 38 | 3 |
| 1Bb2 |  |  |  |  |  |  |  |  |  |  | 53 | 102 | 119 | 102 | 31 | 124 | 61 | 114 | 117 | 112 | 10 | 34 | 26 | 20 | 7 | 32 |
| 1Bb8 |  |  |  |  |  |  |  |  |  |  |  | 109 | 142 | 120 | 74 | 120 | 95 | 140 | 165 | 128 | 63 | 49 | 75 | 49 | 61 | 22 |
| 1Pb6 |  |  |  |  |  |  |  |  |  |  |  |  | 32 | 13 | 120 | 22 | 133 | 31 | 60 | 19 | 96 | 136 | 110 | 49 | 100 | 104 |
| 1Cb1 |  |  |  |  |  |  |  |  |  |  |  |  |  | 22 | 119 | 26 | 114 | 4 | 29 | 13 | 109 | 148 | 112 | 109 | 113 | 133 |
| 1Bb4 |  |  |  |  |  |  |  |  |  |  |  |  |  |  | 114 | 25 | 20 | 20 | 48 | 10 | 94 | 137 | 105 | 89 | 99 | 111 |
| 1Pb12 |  |  |  |  |  |  |  |  |  |  |  |  |  |  |  | 139 | 30 | 115 | 102 | 120 | 31 | 29 | 10 | 51 | 28 | 58 |
| 1Bb10 |  |  |  |  |  |  |  |  |  |  |  |  |  |  |  |  | 140 | 28 | 54 | 19 | 117 | 158 | 130 | 107 | 122 | 122 |
| 1Cb2 |  |  |  |  |  |  |  |  |  |  |  |  |  |  |  |  |  | 112 | 88 | 122 | 60 | 45 | 37 | 80 | 57 | 83 |
| 1Pc1 |  |  |  |  |  |  |  |  |  |  |  |  |  |  |  |  |  |  | 29 | 13 | 104 | 144 | 108 | 105 | 109 | 130 |
| 1Bc2 |  |  |  |  |  |  |  |  |  |  |  |  |  |  |  |  |  |  |  | 41 | 106 | 130 | 98 | 117 | 109 | 146 |
| 1Bc8 |  |  |  |  |  |  |  |  |  |  |  |  |  |  |  |  |  |  |  |  | 103 | 145 | 112 | 99 | 108 | 121 |
| 1Pc6 |  |  |  |  |  |  |  |  |  |  |  |  |  |  |  |  |  |  |  |  |  | 42 | 22 | 22 | 5 | 41 |
| 1Cc1 |  |  |  |  |  |  |  |  |  |  |  |  |  |  |  |  |  |  |  |  |  |  | 36 | 51 | 37 | 40 |
| 1Bc4 |  |  |  |  |  |  |  |  |  |  |  |  |  |  |  |  |  |  |  |  |  |  |  | 44 | 20 | 56 |
| 1Pc12 |  |  |  |  |  |  |  |  |  |  |  |  |  |  |  |  |  |  |  |  |  |  |  |  | 23 | 28 |
| 1Bc10 |  |  |  |  |  |  |  |  |  |  |  |  |  |  |  |  |  |  |  |  |  |  |  |  |  | 39 |

Scheme S1


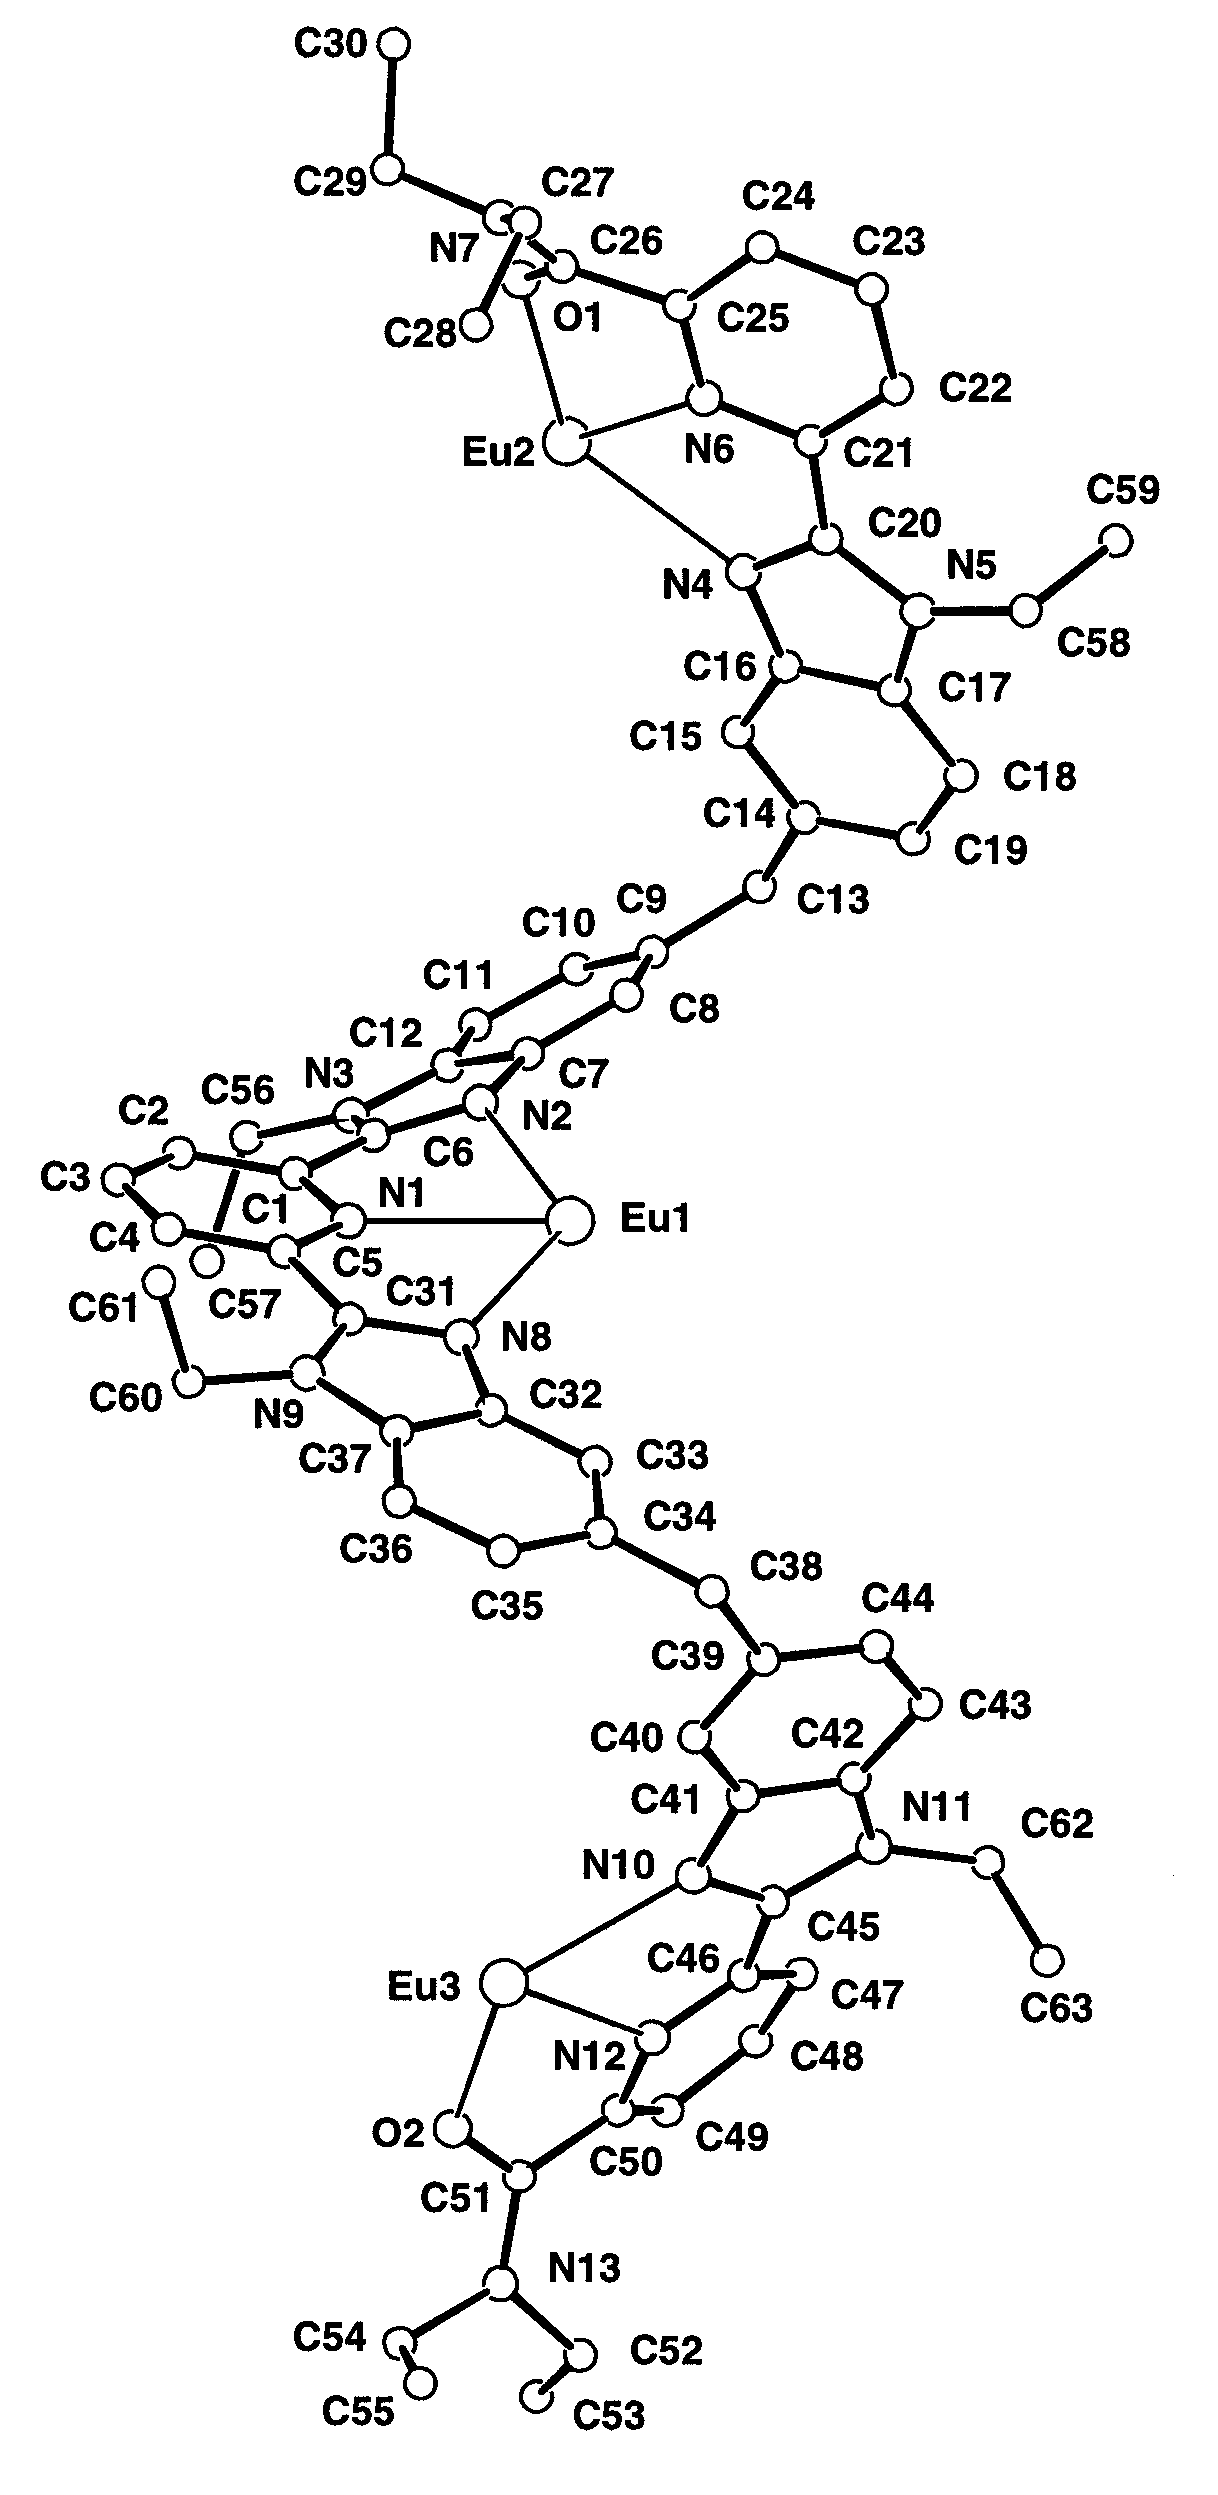


Figure S1 Perspective view of one strand in the cation [Eu3(L3)3]9+ with the atomic numbering scheme.
